# Supplementary material for: Pivotal role of solid phase interactions in the pressure-induced bi-stability of cyanide-bridged Fe 2 Co 2 square complexes
Source: Royal Society of Chemistry journal article supplement (doi:10.1039/d4qi02499k), 2024-11-27
Supplement: d4qi02499k1.pdf [file d4qi02499k1.pdf]

## **Pivotal role of solid-phase interactions for the pressure-induced bi-stability of cyanide-bridged Fe<sub>2</sub>Co<sub>2</sub> square complexes**

Buqin Xu,<sup>a</sup> Yanling Li\*,<sup>a</sup> Geoffrey Gontard,<sup>a</sup> Keevin Béneut,<sup>b</sup> Paraskevas Parisiades,<sup>b</sup> Maxime Deutsche,<sup>c</sup> and Rodrigue Lescouëzec\*<sup>a</sup>

### **Supplementary information**

|                                                                                         |           |
|-----------------------------------------------------------------------------------------|-----------|
| <b>I. FTIR and TGA spectra of 3 and 4 .....</b>                                         | <b>2</b>  |
| <b>II. Structure and crystal packing of 3 and 4 at 200 K and ambient pressure .....</b> | <b>3</b>  |
| <b>IV. ETCST properties of 1 and 3 under various under pressure .....</b>               | <b>8</b>  |
| <b>V. HP-SC-XRD of 3 at 300 K .....</b>                                                 | <b>9</b>  |
| <b>VI. HP-Raman spectres of 3 under pressure at 200 K .....</b>                         | <b>15</b> |

## I. FTIR and TGA spectra of 3 and 4

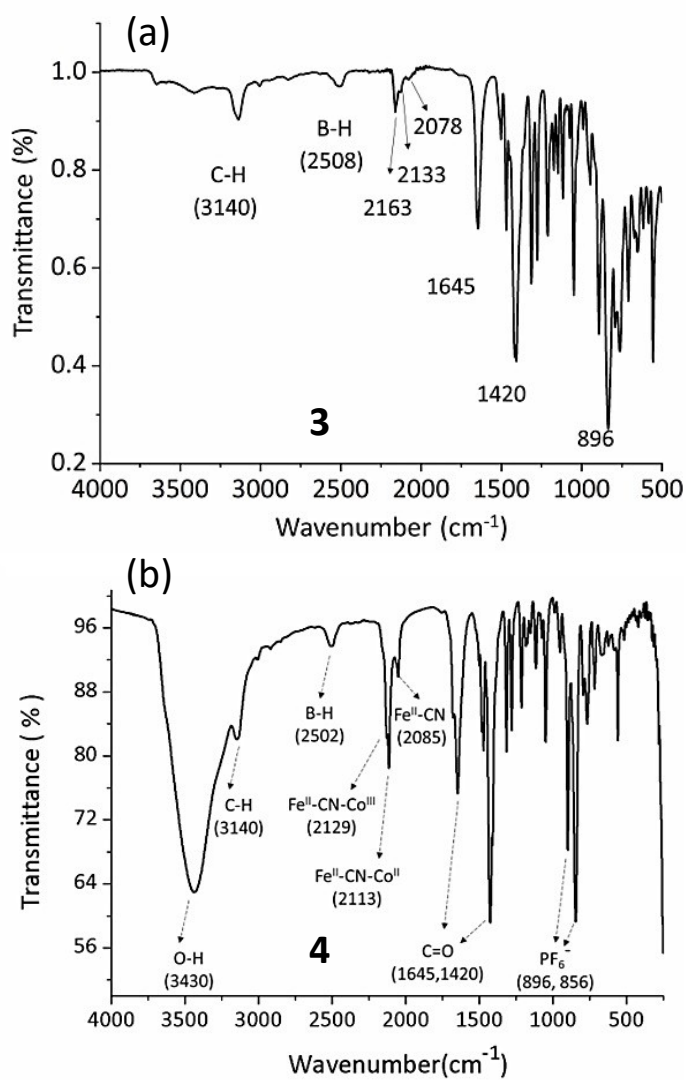

Figure S1. FTIR spectrum of compound 3 (a) and 4 (b).

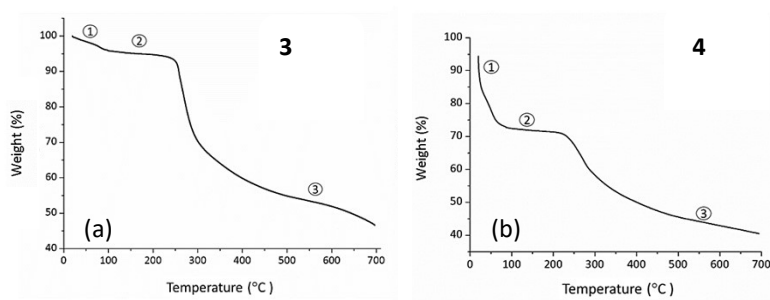

Figure S2. TGA spectrum of 3 (a) and 4 (b) under N<sub>2</sub> flow.

## II. Structure and crystal packing of **3** and **4** at 200 K and ambient pressure

Table S1. Crystallographic data and refinement for **3** and **4**.

| Compound                   | <b>3</b>                                           | <b>4</b>                                    |
|----------------------------|----------------------------------------------------|---------------------------------------------|
| T (K)                      | 200                                                | 200                                         |
| Formula                    | $C_{68}H_{60}B_2Co_2Fe_2N_{34}O_4$<br>·2PF6·2CH3OH | $C_{68}H_{60}B_2Co_2Fe_2N_{34}O_4$<br>·2PF6 |
| Mol Wt.(g/mol)             | 2022.70                                            | 1958.62                                     |
| space group                | Triclinic P-1                                      | Triclinic P-1                               |
| a (Å)                      | 13.773(2)                                          | 15.4654(6)                                  |
| b (Å)                      | 14.300(2)                                          | 17.5513(7)                                  |
| c (Å)                      | 14.438(2)                                          | 19.6656(8)                                  |
| $\alpha$ (°)               | 114.695(3)                                         | 80.292(2)                                   |
| $\beta$ (°)                | 95.479(4)                                          | 79.298(2)                                   |
| $\gamma$ (°)               | 116.910(3)                                         | 84.572(2)                                   |
| V [Å <sup>3</sup> ]        | 2157.0(6)                                          | 5159.0(4)                                   |
| Z                          | 1                                                  | 2                                           |
| $\rho_{calc}/cm^3$         | 1.557                                              | 1.261                                       |
| $\mu$ [mm <sup>-1</sup> ]  | 0.842                                              | 5.655                                       |
| Independent reflections    | 10707                                              | 10769                                       |
| Completeness               | 1.000                                              | 0.996                                       |
| R1 [ $I \geq 2\sigma(I)$ ] | 0.0419                                             | 0.0619                                      |
| wR2 (all data)             | 0.1085                                             | 0.1748                                      |
| CCDC n°                    | 2265639                                            | 2265640                                     |

Table S2. Main structural parameters of **3** and **4**.

| Parameter group | Compound                               | <b>4</b>                             |              |              |
|-----------------|----------------------------------------|--------------------------------------|--------------|--------------|
|                 |                                        | <b>3</b>                             | <b>Sqr a</b> | <b>Sqr b</b> |
| Average         | Fe-(CN)bridging                        | 1.918 (2.5)                          | 1.846 (8)    | 1.858 (7.5)  |
| M-L             | Fe-N(Tp)                               | 1.975 (2.7)                          | 2.003 (5.7)  | 2.002 (6.7)  |
| length (Å)      | Co-(NC)bridging                        | 2.112 (2.5)                          | 1.902 (7)    | 1.873 (6)    |
|                 | Co-N(vbik)                             | 2.137 (2.3)                          | 1.912 (5.8)  | 1.922 (5.5)  |
|                 | $\Sigma$ Fe                            | 23.00                                | 25.60        | 25.4         |
|                 | $\Sigma$ Co                            | 38.06                                | 18.40        | 15.70        |
| Different       | $\angle$ N1C1-Fe or $\angle$ N8C35-Fe  | 172.2 (3)                            | 176.4 (7)    | 174.6 (6)    |
| Angles (°)      | $\angle$ N2C2-Fe or $\angle$ N19C36-Fe | 176.5 (3)                            | 176.2 (6)    | 174.9 (6)    |
|                 | $\angle$ C1N1-Co or $\angle$ C35N18-Co | 167.1 (2)                            | 174.1 (6)    | 172.2 (6)    |
|                 | $\angle$ C2N2-Co or $\angle$ C36N19-Co | 159.3 (2)                            | 172.1 (6)    | 172.2 (2)    |
|                 | Apex angle N-Co-N                      | 93.7 (1)                             | 92.3 (3)     | 92.2 (2)     |
|                 | Apex angle C-Fe-C                      | 85.6 (1)                             | 87.6 (3)     | 88.3 (3)     |
|                 | vbik                                   | $\angle$ Co-C=O1 or $\angle$ Co-C=O3 | 175.38       | 160.6        |
| Conformat.      | $\angle$ Co-C=O2 or $\angle$ Co-C=O4   | 173.97                               | 162.9        | 161.0        |
| (°)             | Dihedral angle vbik1                   | 8.83                                 | 23.3         | 25.1         |
|                 | Dihedral angle vbik2                   | 11.69                                | 24.9         | 28.4         |
| Side and        | d1[Fe...Co]                            | 5.109                                | 4.878        | 4.877        |
| diagonal        | d2[Fe...Co]                            | 5.077                                | 4.862        | 4.872        |
| distances       | diag[Fe...Fe]                          | 7.470                                | 7.037        | 7.058        |
|                 | (Å)                                    | diag[Co...Co]                        | 6.926        | 6.734        |



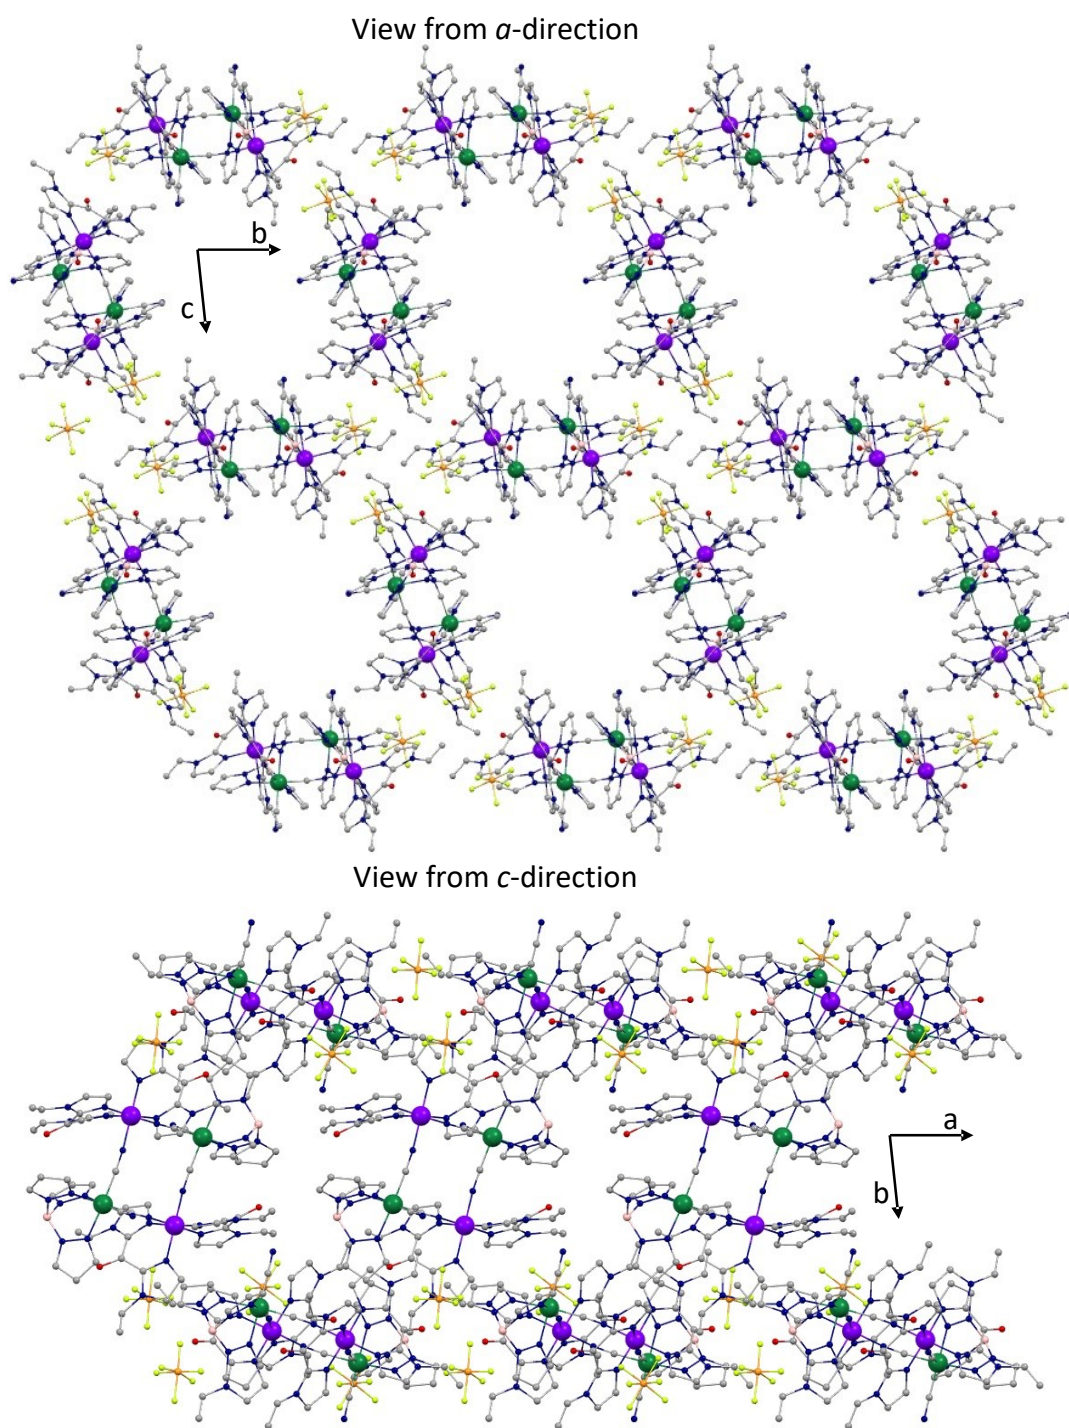

Fig S4. Crystal packing of **4**. Views from  $a$ -direction (top) and  $c$ -direction (bottom) respectively.

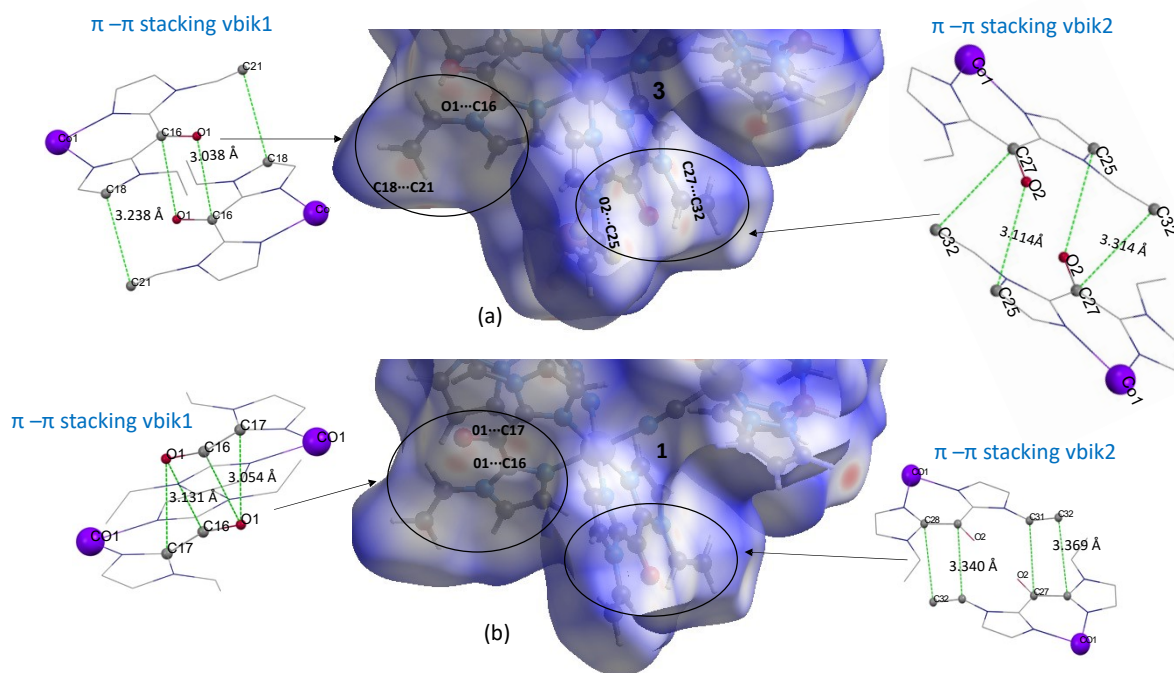

Figure S5. Hirshfeld surface (HS) analysis of vbik  $\pi$ - $\pi$  stackings in **3** (a) and in **1** (b) at 200 K. The HS analysis was done on the structural data with H atom positions normalized by Mercury.

Table S3. Short contact distance over  $d_{vdw}$  (%) in **3** and in **1** at 200K under ambient pressure.

| Contact type                      | Short Contact        | <b>3</b> | <b>1</b> |
|-----------------------------------|----------------------|----------|----------|
| $\pi$ - $\pi$ stacking            | O1...C16             | 94.3     | 98.2     |
| vbik1                             | O1...C17             | 98.6     | 92.8     |
| vbik1- vbik2 (of the same square) | O1...H24             | 92.0     | 92.1     |
| $\pi$ - $\pi$ stacking            | O2...C25             | 96.7     |          |
| vbik2                             | C27...C32            | 97.5     |          |
|                                   | C27...C31            |          | 95.5     |
| Important H...F*                  | Contact number       | 5        | 4        |
| contact of anion                  | av. contact distance | 85.4     | 86.3     |

\* Short contacts giving red spots on Hirshfeld surface ( $d_{vdw} = 2.67 \text{ \AA}$ ).

Comparison of tree main types of intermolecular interactions of **3** and **1** at ambient pressure.

- For vbik1 stacking, the distance between C=O groups arranged parallelly is 3.038  $\text{\AA}$  in **3** ( $d/d_{vdw} = 94.3\%$ ) and 3.131  $\text{\AA}$  in **1** ( $d/d_{vdw} = 97.2\%$ ), with  $d_{vdw} = 3.22 \text{ \AA}$  for O...C short contact. The C=O pair interaction should have higher strength in **3**.
- For vbik2 stacking, both C27...C32 and O2...C25 short contacts in **3** are visible as red spots on its HS. This is not the case for the C27...C31 and C28...C32 short contacts in **1**. It is obvious that the vbik2 stacking is stronger in **3**.
- The H...F short contacts are more numerous in **3** than in **1** and the average H...F distance is shorter in **3** (table S4).

#### IV. ETCST properties of **1** and **3** under various under pressure

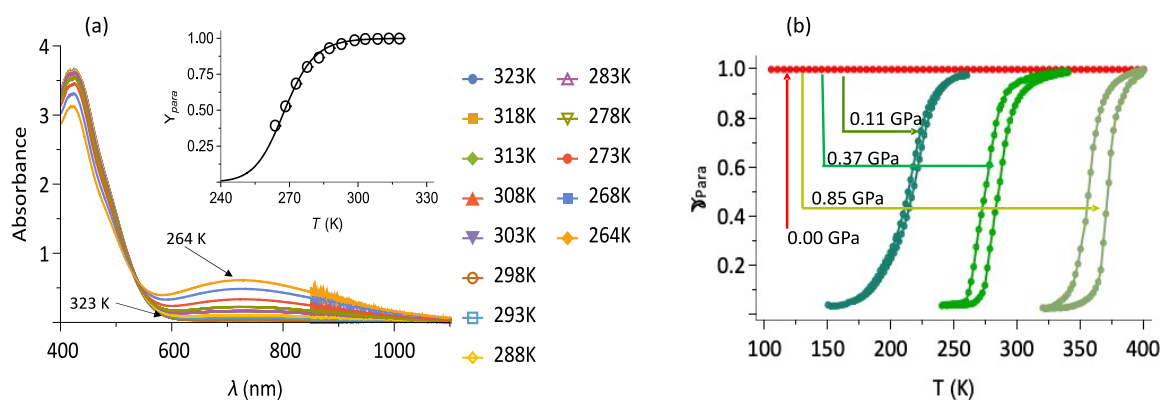

Fig. S6. (a) Variable temperature UV-Vis absorbance at 742 nm (maximum of the Fe<sup>II</sup>-CN-Co<sup>III</sup> IVCT band) of **1** in solution of MeOH at ambient pressure.<sup>S1</sup> The insert illustrates the molar fraction of paramagnetic species versus temperature derived from the UV-visible spectra. (b) Thermal ETCST of **1** in solid state under different hydrostatic pressures.<sup>S2</sup>

#### References

S1. S. De, J.-R. Jimenez, Y. Li, L.-M. Chamoreau, A. Flambard, Y. Journaux, A. Bousseksou and R. Lescouezec, *RSC Adv.*, 2016, 6, 17456–17459.

S2. Y. Li, A. Benchohra, B. Xu, B. Baptiste, K. Béneut, P. Parisiades, L. Delbes, A. Soyer, K. Boukheddaden and R. Lescouezec, *Angewandte Chemie*, 2020, 132, 17425–17429.

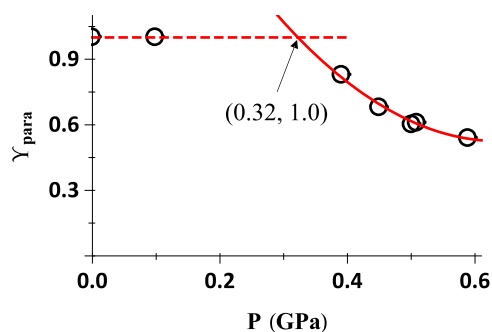

Fig. S7. Estimation of the pressure threshold ( $p_0 = 0.32$  GPa) for para-dia conversion of **3**.  $\gamma_{\text{para}} = 1$  for  $p < 0.32$  GPa,  $\gamma_{\text{para}} = 2.461 - 6.064 P + 4.748 P^2$  for  $p > 0.32$  GPa.



## V. HP-SC-XRD of **3** at 300 K

### V-1. Phase transition provided by HP-SC-XRD

Table S4. Crystal data and structural refinement for the crystals SC1 and SC2 of **3** under increasing and decreasing pressure respectively.

| Pressure (GPa)             | 0.62(13)                                     | 0.76(2)     | 1.55(25)   | 1.77(2)   | 1.60(5)                                      | 1.15(2)    | 0.96(2)      | 0.71(2)      | 0.43(2)     | 0.11(6)      | 0.05(2)      |
|----------------------------|----------------------------------------------|-------------|------------|-----------|----------------------------------------------|------------|--------------|--------------|-------------|--------------|--------------|
| P <sub>initial</sub> (GPa) | 0.5                                          | 0.75        | 1.3        | 1.78      | 1.55                                         | 1.15       | 0.95         | 0.72         | 0.45        | 0.17         | 0.05         |
| P <sub>fin</sub> (GPa)     | 0.75                                         | 0.78        | 1.8        | 1.76      | 1.65                                         | 1.15       | 0.97         | 0.7          | 0.45        | 0.05         | 0.05         |
| Crystal Space group        | SC1 (increasing <i>p</i> )<br>Triclinic, P-1 |             |            |           | SC2 (decreasing <i>p</i> )<br>Triclinic, P-1 |            |              |              |             |              |              |
| a (Å)                      | 13.437(8)                                    | 13.381 (12) | 14.46(2)   | 14.22(4)  | 14.38(3)                                     | 14.24(3)   | 13.096(19)   | 13.206(19)   | 13.609(15)  | 13.633(19)   | 14.09(2)     |
| b (Å)                      | 13.901(5)                                    | 13.838 (8)  | 14.596(17) | 14.43(4)  | 14.482(17)                                   | 14.582(17) | 13.49(3)     | 13.72(3)     | 14.05(2)    | 14.05(3)     | 14.44(3)     |
| c (Å)                      | 14.296(5)                                    | 14.288 (8)  | 18.31(3)   | 17.74(5)  | 17.85(3)                                     | 18.16(3)   | 13.85(4)     | 13.95(3)     | 14.45(2)    | 14.35(3)     | 14.72(3)     |
| α(°)                       | 114.189(7)                                   | 114.146(12) | 93.40(6)   | 92.59(12) | 92.31(5)                                     | 93.15(7)   | 113.51(8)    | 114.15(6)    | 114.38(5)   | 114.29(6)    | 115.16(6)    |
| β(°)                       | 97.054(16)                                   | 97.12(2)    | 89.78(7)   | 91.10(15) | 90.93(8)                                     | 90.84(8)   | 97.42(7)     | 96.32(7)     | 96.80(5)    | 96.60(6)     | 95.10(8)     |
| γ(°)                       | 115.907(15)                                  | 115.89(2)   | 91.68(6)   | 89.95(12) | 90.72(6)                                     | 89.72(9)   | 115.81(6)    | 116.40(6)    | 115.85(4)   | 116.05(6)    | 116.90(7)    |
| Z'                         | 0,5                                          | 0,5         | 1          | 1         | 1                                            | 1          | 0,5          | 0,5          | 0,5         | 0,5          | 0,5          |
| Volume (Å <sup>3</sup> )   | 2037.3(17)                                   | 2019(2)     | 3855.(15)  | 3630.(30) | 3713.(17)                                    | 3763.(17)  | 1879.(7)     | 1930.(9)     | 2109.(5)    | 2099.(6)     | 2266.(7)     |
| V/Z'                       | 4074.6                                       | 4038        | 3855       | 3630      | 3713                                         | 3763       | 3758         | 3860         | 4218        | 4198         | 4532         |
| Struct. Solved             | Yes                                          | Yes         | No         | No        | No                                           | No         | Yes          | Yes          | Yes         | Yes          | Yes          |
| Independ. Refl.            | 8156, 2065                                   | 13002, 2056 | 29089      | 3282      | 30043                                        | 27019      | 7987, 2027   | 6342, 1956   | 11803,2166  | 8837, 2375   | 12004,2146   |
| R <sub>int</sub> (%)       | 10.88                                        | 15.08       | 0.221      | 13.7      | 0.3864                                       | 28.3       | 20.15        | 19.32        | 21.13       | 22.01        | 23.67        |
| Structure solved           | YES                                          | YES         | No         | No        | No                                           | No         | YES          | YES          | YES         | YES          | YES          |
| Completeness               | 0.288                                        | 0.282       | 0.227      | 0.199     | 0.326                                        | 0.22       | 0.298        | 0.28         | 0.285       | 0.312        | 0.263        |
| Dmin(Å), I/Sig             | 0.84, 7.2                                    | 0.83, 6.8   | 0.84, 2.4  | 0.80, 2.3 | 0.89, 2.5                                    | 0.84, 1.5  | 0.83, 3.9    | 0.83, 3.7    | 0.83, 4.3   | 0.83, 3.0    | 0.84, 4.4    |
| R1, wR2 (%)                | 7.83, 22.89                                  | 8.45, 23.80 | -          | -         | -                                            | -          | 10.38, 34.20 | 11.74, 37.59 | 10.57,34.46 | 12.87, 41.24 | 11.93, 38.70 |
| Data/param.                | 6.73                                         | 6.70        | -          | -         | -                                            | -          | 7.74         | 7.47         | 8.26        | 9.06         | 8.19         |
| CCDC n°                    | 2353837                                      | 2353844     |            |           |                                              |            | 2355116      | 2355117      | 2355118     | 2355119      | 2355120      |

As described in main text, we carried out high pressure XRD on two single crystals labelled SC1 and SC2. As the crystal quality decrease rapidly with time, we adopt therefore a strategy to measure quickly the crystal without waiting for the pressure stabilization. We collected data with increasing pressure for crystal SC1 and with decreasing pressure for crystal SC2. On the crystal SC1 we detected a phase transition (Figure 3) showing a doubling of the lattice volume between 0.76(2) GPa and 1.55(25) GPa.

It has not been possible to determine the high-pressure structure due to poor data quality. We therefore carried out experiment with SC2 by decreasing the pressure, unfortunately it was not possible to determine the high-pressure structure. However it show that the transition is reversible because by lowering the pressure we were able to recover the low pressure phase and it allow us to better identify the pressure range at which the transition takes place, between 1.15(5) GPa and

0.96(2)GPa. Moreover at 1.15(5) GPa we also detect some peak doubling (figure S8) which can be a clue for an ongoing phase transition. The  $R_{\text{int}}$  parameter indicates that data quality on SC2 is lower than on SC1 because of time decay of the crystal and also because of the measurements of the low- pressure phase after two transitions. Sometimes even if it was possible to solve the structure and show that the phase transition is reversible we have to constrain more the structure by refining only isotropic thermal motion parameters and by constraining some distances (C-N for 0.05GPa, and PF6 to be rigid, see the cif files deposit: CCDC n° 2355116-2355120). Moreover, the volume evolution is not reliable because at 0.11GPa the sample has to be re-centred during the experiment, introducing a possible bias in the volume estimation. The volume increase under pressure is an artefact due to the bad data).

Even the crystal structure of the high-pressure phase was not solved, the crystal transition is unambiguous as shown by the figure 3 where new diffraction peaks can be identified at high pressure. Moreover, as noted in main text, the low-pressure structure can be expressed in a non-conventional triclinic setting I-1 with cell parameters close to high pressure lattice. Despite significant changes in the parameters and angles between the two P-1 space group, the phase transition may result in a slight reorganization of the molecules in the crystal packing inducing a loss of the centering vector (see table 3 in the main text).

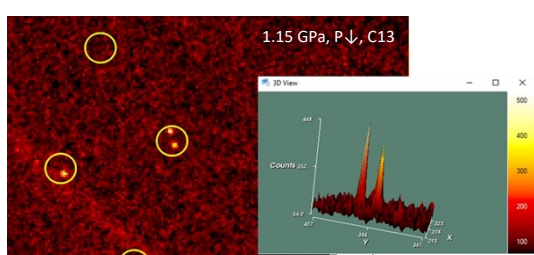

Figure S8. Peak doubling in the diffraction pattern of SC2 at 1.15 GPa.

V-2. Pressure-induced modification of the structures and intermolecular interactions of **3**

Table S5. Selected structural parameters for **3** (SC1) under pressure

| Structural parameters           | P (GPa)              | 0.62 (300 K) | 0.76 (300 K) |
|---------------------------------|----------------------|--------------|--------------|
| Average                         | Fe-(CN)bridging      | 1.94 (3.5)   | 1.94 (3.5)   |
| M-L                             | Fe-N(Tp)             | 1.97 (3.3)   | 1.97 (3.3)   |
| Length* (Å)                     | Co-(NC)bridging      | 2.11 (2.5)   | 2.11 (2.5)   |
|                                 | Co-N(vbik)           | 2.11 (3)     | 2.11 (4.3)   |
|                                 | $\Sigma$ Fe          | 37.0         | 30.0         |
|                                 | $\Sigma$ Co          | 45.0         | 41.0         |
| Different Angles (°)            | $\angle$ N1C1-Fe     | 172 (3)      | 169 (4)      |
|                                 | $\angle$ N2C2-Fe     | 172 (3)      | 178 (4)      |
|                                 | $\angle$ C1N1-Co     | 162 (3)      | 164 (3)      |
|                                 | $\angle$ C2N2-Co     | 158 (3)      | 151 (3)      |
|                                 | Apex angle N-Co-N    | 95 (1)       | 93 (1)       |
|                                 | Apex angle C-Fe-C    | 84 (2)       | 86 (2)       |
| vbik (°)                        | $\angle$ Co-C16=O1   | 170.3        | 172.0        |
|                                 | $\angle$ Co-C27=O2   | 173.2        | 173.1        |
|                                 | Dihedral angle vbik1 | 11.2         | 10.4         |
|                                 | Dihedral angle vbik2 | 13.6         | 12.2         |
| Side and diagonal distances (Å) | d1[Fe...Co]          | 5.06         | 5.05         |
|                                 | d2[Fe...Co]          | 5.03         | 5.02         |
|                                 | diag[Fe...Fe]        | 7.40         | 7.38         |
|                                 | diag[Co...Co]        | 6.85         | 6.83         |

\*The  $\sigma$  value for the average M-L length was calculated by averaging the  $\sigma$  values of each individual M-L length.

Table S6. Selected structural parameters for **3** (SC2) under different pressures at 300K compared to that obtained on a single crystal without DAC at 200K.

| Structural parameters           | P (GPa)                     | 0 (200 K)   | 0.05 (300 K) | 0.11 (300 K) | 0.45 (300 K) | 0.70 (300 K) | 0.95 (300 K) |
|---------------------------------|-----------------------------|-------------|--------------|--------------|--------------|--------------|--------------|
| Average                         | Fe-(CN) <sub>bridging</sub> | 1.918 (2.5) | 1.90 (3.5)   | 1.91 (3.5)   | 1.94 (3)     | 1.82(4)      | 1.84(3)      |
| M-L                             | Fe-N <sub>TP</sub>          | 1.975 (2.7) | 1.93(4)      | 1.92(4)      | 1.96 (4)     | 1.87 (4)     | 1.94(4)      |
| Length* (Å)                     | Co-(NC) <sub>bridging</sub> | 2.112 (2.5) | 2.19 (3.5)   | 2.18(3.5)    | 2.13 (3)     | 2.12(3.5)    | 2.10(3.5)    |
|                                 | Co-N <sub>vbik</sub>        | 2.137 (2.3) | 2.11 (3)     | 2.11(3.5)    | 2.14 (3)     | 2.12(4.0)    | 2.10(3)      |
|                                 | ∑Fe                         | 23.00       | 30           | 27           | 38           | 38           | 25           |
|                                 | ∑Co                         | 38.06       | 52           | 48           | 38           | 39           | 39           |
| Different                       | ∠N1C1-Fe                    | 172.2 (3)   | 177 (4)      | 176 (4)      | 173(3)       | 173 (4)      | 167 (4)      |
| Angles (°)                      | ∠N2C2-Fe                    | 176.5 (3)   | 176 (3)      | 179 (4)      | 176(3)       | 175 (4)      | 176 (3)      |
|                                 | ∠C1N1-Co                    | 167.1 (2)   | 160 (4)      | 161 (4)      | 163(3)       | 160 (4)      | 164 (3)      |
|                                 | ∠C2N2-Co                    | 159.3 (2)   | 160 (3)      | 155 (3)      | 153(2)       | 149 (3)      | 148 (3)      |
|                                 | Apex angle N-Co-N           | 93.7 (1)    | 94 (1)       | 94 (1)       | 92 (1)       | 94 (1)       | 94 (1)       |
|                                 | Apex angle C-Fe-C           | 85.6 (1)    | 86 (2)       | 87 (2)       | 86 (1)       | 87 (2)       | 88 (2)       |
|                                 |                             | ∠Co-C16=O1  | 175.4        | 171.0        | 174.2        | 175.9        | 176.6        |
| vbik (°)                        | ∠Co-C27=O2                  | 174.0       | 174.9        | 172.9        | 174.6        | 170.3        | 174.0        |
|                                 | Dihedral angle vbik1        | 8.83        | 9.6          | 11.8         | 8.3          | 11.4         | 11.1         |
|                                 | Dihedral angle vbik2        | 11.69       | 8.2          | 10.5         | 11.2         | 13.8         | 14.1         |
| Side and diagonal distances (Å) | d1[Fe...Co]                 | 5.11        | 5.16         | 5.08         | 5.11         | 4.95         | 4.95         |
|                                 | d2[Fe...Co]                 | 5.08        | 5.11         | 5.04         | 5.06         | 4.96         | 4.93         |
|                                 | diag[Fe...Fe]               | 7.47        | 7.47         | 7.41         | 7.47         | 7.29         | 7.27         |
|                                 | diag[Co...Co]               | 6.93        | 7.05         | 6.89         | 6.91         | 6.70         | 6.69         |

\*The  $\sigma$  value for the average M-L length was calculated by averaging the  $\sigma$  values of each individual M-L length.

The linear regression equations of M-L versus p data:

$$2.16 - 0.071 p \text{ for } \text{Co-N}_{\text{bridge}}$$

$$1.92 - 0.047 p \text{ for } \text{Fe-C}_{\text{bridge}}$$

$$2.12 - 0.016 p \text{ for } \text{Co-N}_{\text{vbik}}$$

$$1.95 - 0.009 p \text{ for } \text{Fe-N}_{\text{TP}}$$

The linear regression equations for the two Co-NC angles:

$$162.68 - 0.091 p \text{ for } \angle \text{CoN1C1}$$

$$158.96 - 10.56 p \text{ for } \angle \text{CoN2C2}$$

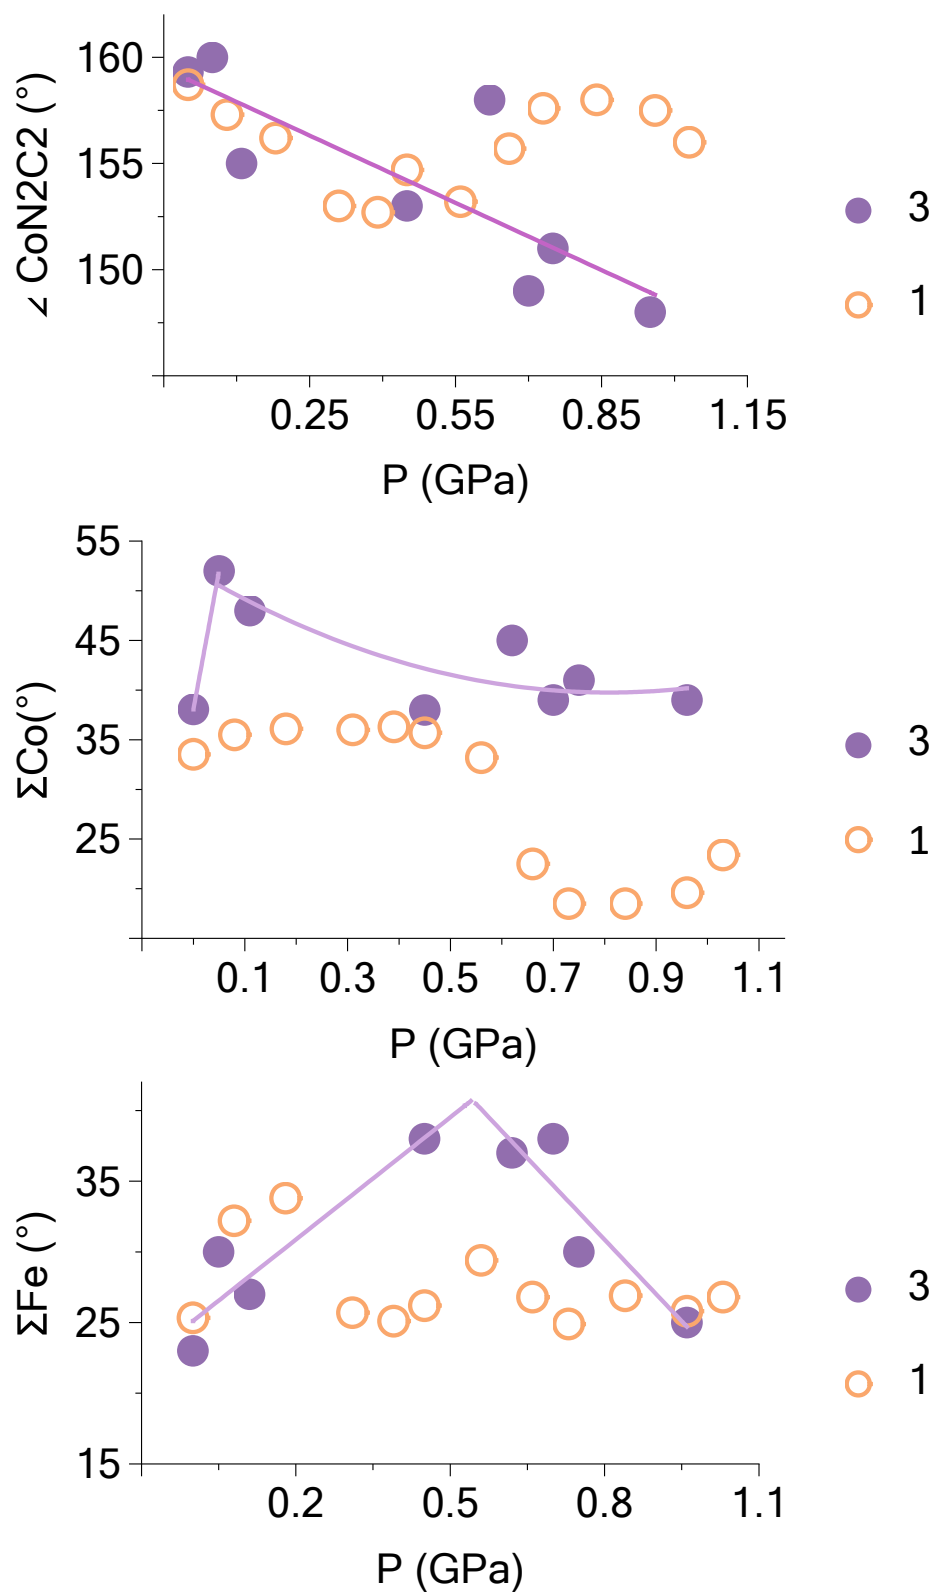

Fig. S9 Three distortion parameters versus pressure for the core structure of **3** and **1**:  $\angle \text{CoN2C2}$  (above),  $\Sigma \text{Co}$  (middle) and  $\Sigma \text{Fe}$  (bottom) The solid lines are for eye – guides.

## VI. HP-Raman spectres of **3** under pressure at 200 K

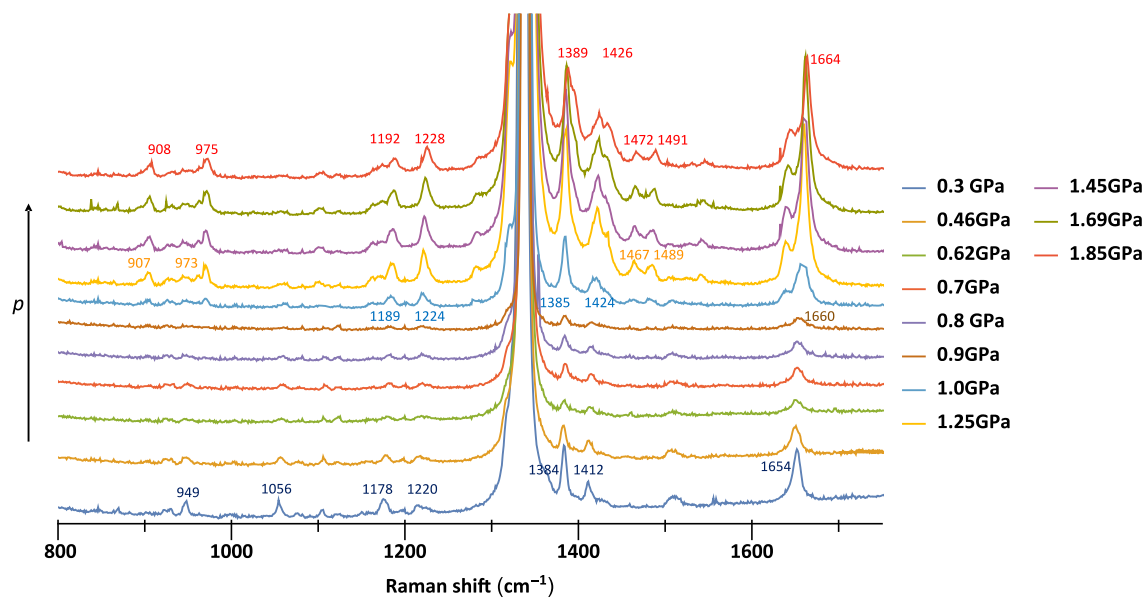

Figure S10. HP-Raman Spectra of **3** from 800 to 1750  $\text{cm}^{-1}$  at 200 K with increasing pressure (0.30 – 1.85 GPa).

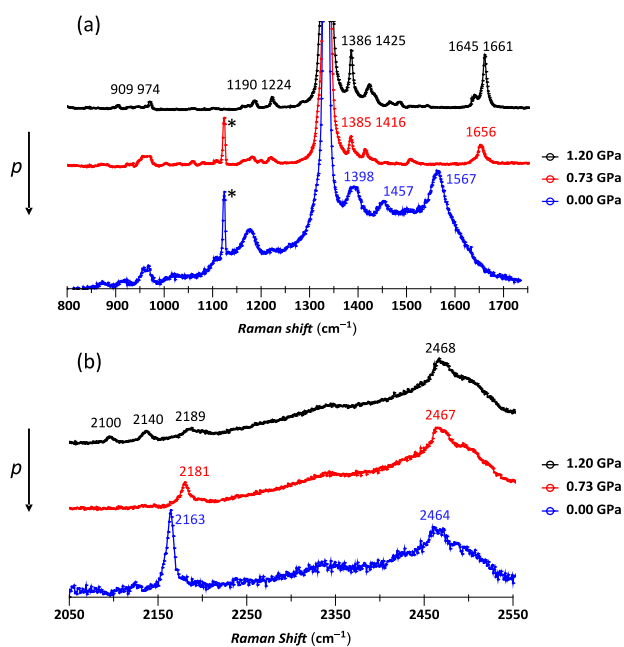

Figure S11. HP-Raman Spectra of **3** at 200 K with decreasing (1.20-0.0 GPa) pressure, from 800 to 1750  $\text{cm}^{-1}$  (a) and from 2050 to 2550  $\text{cm}^{-1}$  (b).

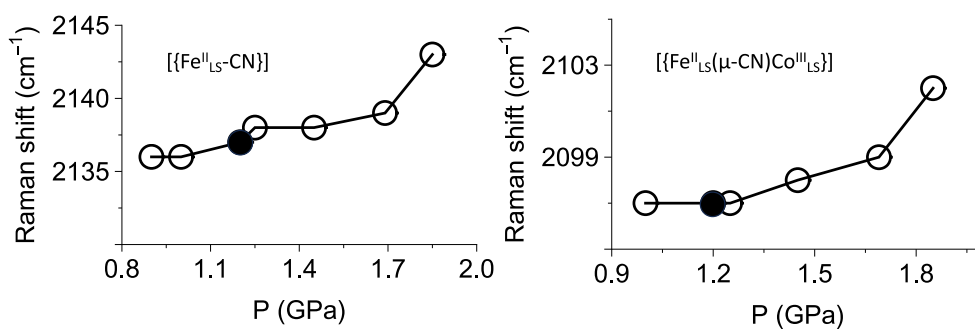

Figure S12. Blue shifts of Raman bands attributed to the vibration of the free  $[\text{Fe}^{\text{II}}\text{-CN}]$  group (left) and to that of  $[\text{Fe}^{\text{II}}\text{-CN-Co}^{\text{III}}]$  moiety (right). The circles represent the experimental data with increasing pressure and the disk, that with decreasing pressure.
